# Supplementary material for: Dr. Ilse Seibold, née Usbeck, 1925–2021
Source: Springer Nature journal article supplement (doi:10.1007/s00531-021-02052-6), 2021-07-14
Supplement: MOESM1 [file 531_2021_2052_MOESM1_ESM.docx]

**PUBLICATIONS of Dr. ILSE SEIBOLD**

I. Usbeck, 1952: Zur Kenntnis von Mikrofauna und Stratigraphie im unteren Lias alpha Schwabens. - N. Jb. Geol. Paläontol. Abh. 95 (3), 371-376.

I. Seibold, 1953: Aus den Anfängen der Foraminiferenforschung. - Aus der Heimat, Öhringen, 61 (5), 124-128.

E. and I. Seibold, 1953: Foraminiferenfaunen und Kalkgehalt eines Profils im gebankten unteren Malm Schwabens. - N. Jb. Geol. Paläontol. Abh. 98 (1), 28-86.

E. and I. Seibold, 1955: Revision der Foraminiferen-Bearbeitung C.W. Gümbel's (1862) aus den Streitberger Schwamm-mergeln (Overfranken, Unterer Malm). - N. Jb. Geol. Paläontol. Abh. 101 (1), 91-134.

E. and I. Seibold, 1956: Revision der Foraminiferen-Bearbeitung G. Schwager's (1865) aus den *Impressa* Schichten (Unterer Malm) Süddeutschlands. - N. Jb. Geol. Paläontol. Abh. 101 (1), 91-134.

I. Seibold, 1958: Ätzversuche an Schwämmen. - Aus der Heimat, Öhringen, 66, 47-51.

E. and I. Seibold, 1960: Foraminiferen der Bank- und Schwammfazies im unteren Malm Süddeutschlands. - N. Jb. Geol. Paläontol. Abh. 109 (3), 309-438.

E. and I. Seibold, 1960: Über Funde von Globigerinen an der Dogger/Malm-Grenze Süddeutschlands.- Intern. Geol. Congress, 21. Session 6, Kopenhagen.

I. Seibold, 1971: Ammonia BRÜNNICH (Foram) und verwandte Arten aus dem Indischen Ozean (Malabar Küste, SW Indien). - Paläont. Z., 45, 41-52.

E. and I. Seibold, 1973: *Cassidella panikkari* n.sp. (Foram) from the Kerala Shelf. - Spec. Publ. mar. biol. Assoc. India, 87-90.

I. Seibold, 1974: Preliminary report on the transport of foraminifera into Cochin Backwater. - J. mar. bio. Assoc. India, 2, 452-455.

I. Seibold, 1975: Benthonic foraminifera from the coast and lagoon of Cochin (South India). - Revista Espaniola Micropaleontologia, 7 (2), 175-213.

I. Seibold and K.I. Kuznetsova, 1977: Foraminifera from the Upper Jurassic and Lower Cretaceous of the Eastern Atlantic (DSDP Leg 41, Sites 367 and 367). - Initial Rpt. DSDP 41, Washington D.C., 515-537.

E. and I. Seibold, 1981: Offshore and lagoonal benthic foraminifera near Cochin (Southwest India). Distribution, transport, ecological aspects. - N. Jb. Geol. Paläontol. Abh. 162 (1), 1-56.

I. Usbeck, 1982: Studenten-Muffel -–Texte und Thesen. - Sachgebiet Gesellschaft, Edition Interfrom, Zürich. 87 pp.

I. Seibold, 1987: Anfänge der Deutschen Meeresgeologie. - JOHANNES WALTHER zum Gedächtnis. - Zeitschr. Dt. Geol. Ges. 138, 1-12.

I. und E. Seibold, 1989: Neues aus dem Geologenarchiv (1988). Geol. Rdsch. 78 (2), 441-442.

I. und E. Seibold, 1990: Neues aus dem Geologenarchiv (1989) - Mit Bemerkungen zu "F.A. QUENSTEDT und das amerikanische Erdöl". Geol. Rdsch. 79 (2), 167-170.

I. und E. Seibold, 1991: Neues aus dem Geologenarchiv (1990) - Mit Erinnerungen an Franz Kossmat. - Geol. Rdsch. 80 (3) 801-804.

I. Seibold, 1992: Der Weg zur Biogeologie: Johannes Walther (1860-1937): Ein Forscherleben im Wandel der deutschen Universität. - Springer Verlag Berlin, 196 S.

I. und E. Seibold, 1992: Neues aus dem Geologenarchiv (1991) - Mit Erinnerungen an Alfred Wegener und Otto Ampferer: Warten auf Anerkennung. - Geol. Rdsch. 81 (2), 267-273.

I. und E. Seibold, 1993: Neues aus dem Geologenarchiv (1992) - Vier Deutsche in der Frühzeit der Geowissenschaften in Japan. - Geol. Rdsch. 82, 601-603.9

I. Seibold, 1993: Stationen auf dem Lebensweg JOHANNES WALTHERs (1860-1937). - Z. Dt. Geol. Ges. 144, 249-254.

I. Seibold, 1993: Ist Spitzweg denn an allem Schuld? - Natur und Museum 123 (12), 387-396.

I. und E. Seibold, 1994: Neues aus dem Geologenarchiv (1993) - Hans Stille, Ernst Kraus und die Frage Fixismus und Mobilismus. - Geol. Rdsch. 83, 469-471.

I. und E. Seibold, 1995: Neues aus dem Geologenarchiv (1993) - Walther Penck 1921 Pläne für eine deutsche Pazifik-Expedition. - Geol. Rdsch. 84, 860-864.

I. und E. Seibold, 1995: Hermann Credner - ein Portrait. - Zeitschr. Dt. Geol. Ges. 146, 303-304 (mit H.D. Lang).

I. und E. Seibold, 1995: Ein vielversprechender Nachwuchsgeologe: Hermann Credner (1841-1913). - Zeitschr. Dt. Geol. Ges. 146, 305-312.

I. und E. Seibold, 1996: Das Geologenarchiv in Freiburg - Bilder von Tagungen des Oberrheinischen Geologischen Vereins. - Jber. Mitt. Oberrhein. Geol. Verein, NF 78, 177-182.

E. und I. Seibold, 1996: Vereisung und Meeresspiegel - Anfänge der Erforschung. - Geol. Rdsch. 85, 403-408.

I. und E. Seibold, 1996: Neues aus dem Geologenarchiv: Charles Edgar Stehn: Der Ausbruch des Anak Krakatau im Mai 1933. - Geol. Rdsch. 85, 615-618.

I. Seibold, 1996: Nicht ein jeder kann Geologe werden. - Abh. Geol. Bundesanstalt Wien, 53, 15-22.

I. Seibold, 1997: Das Geologenarchiv in Freiburg/ Breisgau - Hommage an Leoben. - Ber. Geol. Bundesanstalt Wien 41, 195-199.

I. und E. Seibold, 1997: Neues aus dem Geologenarchiv: Heinrich Georg Bronn: Ein Brief von 1855 zur Evolutionstheorie von Darwins Werk von 1859. - Geol. Rdsch. 86, 518-521.

I. Seibold, J. Kullman und K. Vogel, 1997: O.H. Schindewolf (1896 - 1971) - A revised picture of an eminent scientist. - Earth Sciences History, 16 (1), p.2.

I. Seibold, 1998: Johannes Weigel - In: C. Römer (Hrsgb.) Mitteldeutsches Jahrbuch, Böhlau, Weimar, 5, 238-239.

I. und E. Seibold, 1998: Die Gründungsmitglieder der Deutschen Geologischen Gesellschaft. - Terra Nostra, 98 (3), 6-10.

I. und E. Seibold, 1998: Neues aus dem Geologenarchiv - Vom Neubeginn der "Geologischen Rundschau" 1945. - Geol. Rdsch. 87, 243-246.

E. und I. Seibold, 2000: Hans Cloos (1885-1951) - Dokumente aus seinem Leben. - Geol. Rdsch./ Intern. J. Earth Sciences, 88, 853-867.

E. und I. Seibold, 2001: Neues aus dem Geologenarchiv (für 2000). Wiener Geologen im Spiegel des Geologenarchivs - Kober-Kieslinger-Ampferer. - Geol. Rdsch./ Intern. J. Earth Sciences, 90, 211-216.

I. Seibold, 2001: Die Geologen und die Künste. - Kleine Senckenberg-Reihe 39, Schweizerbart, Stuttgart, 154 pp.

E. und I. Seibold, 2001: Paulcke. - In: Neue Deutsche Biographie. Duncker & Humblot, Berlin, 20, 117-118.

I. Seibold, 2001: Pfannenstiel. - In: Neue Deutsche Biographie 20, 299-300.

E. und I. Seibold, 2002: Der Einfluss James Huttons aktualistischen Vorstellungen auf Karl Ernst Adolf von Hoff. - In: H. Albrecht und R. Ladwig (eds.): Abraham Gottlob Werner und die Begründung der Geowissenschaften. Freiberg/Sachsen, 310-316.

E. und I. Seibold, 2002: "Was aber bleibet, stiften die Dichter". - In: Gerold Wefer (ed.) Expedition Erde - Beiträge zum Jahr der Geowissenschaften, Bremen, 234-245.

E. und I. Seibold, 2002: Alfred Bentz - Erdölgeologe in schwieriger Zeit, 1938-1947. - Geol. Rdsch./ Intern. J. Earth Sciences, 91, 1081-1093.

I. Seibold, 2003: Nachtrag zu dem Artikel über Wilfried von Seidlitz. - Nachrichtenblatt zur Geschichte der Geowissenschaften, Krefeld und Flensburg, 13, 91.

E. und I. Seibold, 2003: Erratische Blöcke - Erratische Folgerungen: ein unbekannter Brief von Leopold von Buch von 1918. - Geol. Rdsch./ Intern. J. Earth Sciences, 92, 426-439.

E. und I. Seibold und J. Thiede, 2004: Quicktone - Ein Interview mit Ivan Thoralf Rosenquist. - Geol. Rdsch./ Intern. J. Earth Sciences, 93, 645-651.

I. Seibold, 2004: Die Fotosammlung im Freiburger Geologenarchiv: Biographien und Autobiographien in der Geschichte der Geowissenschaften und Geographie. - Leibniz-Institut für Länderkunde Leipzig: 37.

E. und I. Seibold, 2004: Nachlässe: Erfahrungen aus dem Freiburger Geologenarchiv. Biographien und Autobiographien in der Geschichte der Geowissenschaften und Geographie. - Leibniz-Institut für Länderkunde Leipzig, 35-36.

E. und I. Seibold, 2005: Milankovitch's Strahlungskurve und deren geologische Deutung - Anfänge in Deutschland. - Geol. Rdsch./ Intern. J. Earth Sciences, 94, 495-503.

I. Seibold, 2005: Walther. - In: R. Selly et al. (eds.), Encyclopedia of Geology. Amsterdam, 242-245.

I. Seibold, 2005: Der Bildbestand des Freiburger Geologen-Archivs. - Nachrichtenblatt zur Geschichte der Geowissenschaften, Krefeld und Flensburg, 15, 82-86.

E. und I. Seibold, 2006: Herrmann Wilhelm Abich im Kaukasus: Zum zweihundertsten Geburtstag. - Geol. Rdsch./ Intern. J. Earth Sciences, 95, 1087-1100.

E. und I. Seibold, J. Keller und K. Lutz, 2007: Max Blanckenhorn - Ein facettenreicher Reisebericht aus dem Vorderen Orient - 50 Jahre Freiburger Geologenarchiv. - Nachrichtenblatt zur Geschichte der Geowissenschaften, Krefeld und Flensburg, 17, 13-22.

E. und I. Seibold, 2008: Curt Teichert - Dokumente zu einer Emigration - Dänemark-Australien-USA. - Geol. Rdsch./ Intern. J. Earth Sciences, 97, 665-673.

E. und I. Seibold, 2009: Religious convictions as support in dangerous expeditions: Hermann Abich (1806-1886) and Heinrich Barth (1821-1865). - In: M. Kölbl-Ebert (ed.) The Geological Society of London, Spec. Publ. 310, 217-221.

E. und I. Seibold, 2009: Buffon (1707-1788) als geologischer Pionier. - Geol. Rdsch./ Intern. J. Earth Sciences, 98, 2023-2029.

E. und I. Seibold, 2010: Gustav Steinmann (1856-1929): Ein deutscher Ordinarius der Kaiserzeit. Neues aus dem Geologenarchiv. - Geol. Rdsch./ Intern. J. Earth Sciences, 99 (Suppl. 1), 3-15.

E. und I. Seibold, 2012: Zum Auf und Ab des Meeresspiegels in Skandinavien: Langer Streit um Eustasie oder Isostasie. Neues aus dem Geologenarchiv. - Geol. Rdsch./ Intern. J. Earth Sciences, 101, 595-602.

,,,,,,,,,,,,,,,,,,,,,,,,,,,,,,,,,,,,,,,,,,,,,,,,,,,,,,,,,,,,,,,,,

Bernhard Fritscher 2009: Laudatio zur Verleihung des Abraham-Gottlob-Werner Medaille (an Ilse Seibold). - Zeitschr. Deut. Geol. Ges. 160 (2), ?19 - 00.
